# Supplementary material
Source: publisher site journal article supplement (https://www.dovepress.com/article/402275)
Supplement: Supplementary file 1 [file get_supplementary_file.php]

**Table S1 Information on MBLs-producing strains collected from multicentres**

| No. | Organism | β-lactamases | The institution |
| --- | --- | --- | --- |
|
| ECL1012 | *E. cloacae complex* | NDM-1, CTX-M-3, SHV-12 | SHAM |
| ECO1060 | *E. coli* | NDM-5, CTX-M-15 | SHAM |
| ECO1085 | *E. coli* | NDM-1, CTXM-14 | SHAM |
| KPN1011 | *K. pneumoniae* | NDM-1, CTX-M-15, SHV-12 | SHAM |
| KPN1062 | *K. pneumoniae* | NDM-5, SHV-12 | SHAM |
| CFR1077 | *C.freundii* | NDM-1, SHV-12, TEM-1 | SHAM |
| KOX0228 | *K. oxytoca* | KPC-2, IMP-4, SHV-12 | SHAM |
| ECO1086 | *E. coli* | NDM-1, CTX-M-15 | SHAM |
| ECO1007 | *E. coli* | NDM-1, CTXM-14, TEM-1 | SHAM |
| KPN1108 | *K. pneumoniae* | NDM-1, CTX-M-65, SHV-12 | SHAM |
| KPN3528 | *K. pneumoniae* | NDM-1, CTX-M-14, SHV-12 | SHAM |
| ECL1034 | *E. cloacae complex* | NDM-1, CTX-M-9 | SHAM |
| ECL1031 | *E. cloacae complex* | NDM-5, CTX-M-9, TEM-1 | SHAM |
| KPN1039 | *K. pneumoniae* | NDM-1, SHV-12 | SHAM |
| ECL1007 | *E. cloacae complex* | NDM-1, CTX-M-3 | SHAM |
| KOX1036 | *K. oxytoca* | NDM-1, SHV-12, TEM-1 | SHAM |
| KPN0429 | *K. pneumoniae* | NDM-1 | SHAM |
| KPN1037 | *K. pneumoniae* | IMP-4, SHV-81 | SHAM |
| ECO1065 | *E. coli* | NDM-7, CTX-M-15, TEM-1 | FHAM |
| ECO5215 | *E. coli* | NDM-5, CTX-M-15 | FHAM |
| ECO5061 | *E. coli* | NDM-1, CTX-M-64, TEM-1, SHV-12 | FHAM |
| ECO5104 | *E. coli* | NDM-5, CTX-M-65 | FHAM |
| ECO6221 | *E. coli* | NDM-1, CTX-M-14, TEM-1 | FHAM |
| ECO4967 | *E. coli* | NDM-1, CTX-M-14, TEM-1 | FHAM |
| ECO6014 | *E. coli* | NDM-3, CTX-M-15 | FHAM |
| ECO5010 | *E. coli* | NDM-1, CTX-M-14 | FHAM |
| ECL3024 | *E. cloacae complex* | NDM-1, CTX-M-3 | FHAM |
| KPN9389 | *K. pneumoniae* | NDM-1, CTX-M-65, SHV-12 | APH |
| ECO8096 | *E. coli* | NDM-1, CTX-M-15 | APH |
| ECO8046 | *E. coli* | NDM-1, CTX-M-9 | APH |
| KPN8696 | *K. pneumoniae* | NDM-1, SHV-110, TEM-1 | APH |
| KPN9398 | *K. pneumoniae* | NDM-1, SHV-28 | APH |

APH: the Anhui Provincial Hospital; FHAM, the First Affiliated Hospital of Anhui Medical University; SHAM: the Second Hospital of Anhui Medical University.

**Table S2 Comparison of remaining two sets of results between the DSE method and checkerboard assay**

| No. | Carbapenemase | MIC of individual（mg/L） | |  | The Checkerboard assay | | | |  | The DSE method | | | | | Compar  -ison |
| --- | --- | --- | --- | --- | --- | --- | --- | --- | --- | --- | --- | --- | --- | --- | --- |
| MIC of combin  -ation (mg/L) | | FICI | Interpre  -tation | Inhibition zone (mm) | | | | Interpre  -tation |
| ATM | CZA | ATM | CZA | ATM | CZA | ATMCZA | CZAATM |
| **Day1** |  |  |  |  |  |  |  |  |  |  |  |  |  |  |  |
| The results were list in Table 1. | | | | | | | | | | | | | | |  |
| **Day2** |  |  |  |  |  |  |  |  |  |  |  |  |  |  |  |
| ECO1007 | NDM-1 | 128 (R) | 128/4 (R) |  | 2 | 2/4 | 0.03 | Syn |  | 6 (R) | 6 (R) | 22 (S) | 19 (S) | Syn | CA |
| ECO1060 | NDM-5 | 64 (R) | 128/4 (R) |  | 4 | 1/4 | 0.07 | Syn |  | 6 (R) | 6 (R) | 23 (S) | 20 (S) | Syn | CA |
| ECO1065 | NDM-7 | 128 (R) | 64/4 (R) |  | 2 | 4/4 | 0.08 | Syn |  | 6 (R) | 6 (R) | 24 (S) | 22 (S) | Syn | CA |
| ECO1085 | NDM-1 | 128 (R) | 128/4 (R) |  | 2 | 1/4 | 0.02 | Syn |  | 6 (R) | 6 (R) | 23 (S) | 22 (S) | Syn | CA |
| ECO1086 | NDM-1 | 128 (R) | 64/4 (R) |  | 4 | 2/4 | 0.06 | Syn |  | 6 (R) | 7 (R) | 25 (S) | 23 (S) | Syn | CA |
| ECO4967 | NDM-1 | 64 (R) | 64/4 (R) |  | 8 | 4/4 | 0.19 | Syn |  | 6 (R) | 6 (R) | 23 (S) | 14 (S) | Syn | CA |
| ECO5010 | NDM-1 | 64 (R) | 128/4 (R) |  | 8 | 4/4 | 0.16 | Syn |  | 14 (R) | 6 (R) | 30 (S) | 28 (S) | Syn | CA |
| ECO5061 | NDM-1 | 64 (R) | 64/4 (R) |  | 8 | 8/4 | 0.25 | Syn |  | 6 (R) | 6 (R) | 15 (R) | 13 (S) | NI | MIE |
| ECO5104 | NDM-5 | 128 (R) | 64/4 (R) |  | 4 | 4/4 | 0.09 | Syn |  | 6 (R) | 7 (R) | 24 (S) | 23 (S) | Syn | CA |
| ECO5215 | NDM-5 | 128 (R) | 64/4 (R) |  | 2 | 1/4 | 0.03 | Syn |  | 6 (R) | 6 (R) | 25 (S) | 24 (S) | Syn | CA |
| ECO6014 | NDM-3 | 128 (R) | 64/4 (R) |  | 1 | 1/4 | 0.02 | Syn |  | 6 (R) | 6 (R) | 23 (S) | 22 (S) | Syn | CA |
| ECO6221 | NDM-1 | 64 (R) | 64/4 (R) |  | 4 | 4/4 | 0.13 | Syn |  | 6 (R) | 6 (R) | 24 (S) | 22 (S) | Syn | CA |
| ECO8046 | NDM-1 | 128 (R) | 64/4 (R) |  | 8 | 2/4 | 0.09 | Syn |  | 6 (R) | 6 (R) | 23 (S) | 22 (S) | Syn | CA |
| ECO8096 | NDM-1 | 64 (R) | 128/4 (R) |  | 16 | 8/4 | 0.31 | Syn |  | 6 (R) | 6 (R) | 14 (R) | 13 (S) | NI | MIE |
| ECL1007 | NDM-1 | 128 (R) | 32/4 (R) |  | 1 | 1/4 | 0.04 | Syn |  | 7 (R) | 8 (R) | 25 (S) | 25 (S) | Syn | CA |
| ECL1012 | NDM-1 | 128 (R) | 128/4 (R) |  | 0.5 | 1/4 | 0.01 | Syn |  | 6 (R) | 6 (R) | 25 (S) | 24 (S) | Syn | CA |
| ECL1031 | NDM-5 | 64 (R) | 32/4 (R) |  | 1 | 1/4 | 0.05 | Syn |  | 6 (R) | 6 (R) | 22 (S) | 20 (S) | Syn | CA |
| ECL1034 | NDM-1 | 64 (R) | 32/4 (R) |  | 1 | 1/4 | 0.05 | Syn |  | 15 (R) | 10 (R) | 23 (S) | 22 (S) | Syn | CA |
| ECL3024 | NDM-1 | 128 (R) | 64/4 (R) |  | 4 | 4/4 | 0.09 | Syn |  | 6 (R) | 6 (R) | 26 (S) | 25 (S) | Syn | CA |
| KPN0429 | NDM-1 | 0.25 (S) | 32/4 (R) |  | 0.25 | 0.5/4 | 1.02 | NI |  | 30 (S) | 6 (R) | 33 (S) | 30 (S) | NI | CA |
| KPN1011 | NDM-1 | 128 (R) | 128/4 (R) |  | 4 | 2/4 | 0.05 | Syn |  | 6 (R) | 6 (R) | 25 (S) | 24 (S) | Syn | CA |
| KPN1037 | IMP-4 | 0.25 (S) | 32/4 (R) |  | 0.25 | 0.25/4 | 1.01 | NI |  | 25 (S) | 10 (R) | 28 (S) | 24 (S) | NI | CA |
| KPN1039 | NDM-1 | 32 (R) | 64/4 (R) |  | 1 | 1/4 | 0.05 | Syn |  | 11 (R) | 6 (R) | 25 (S) | 25 (S) | Syn | CA |
| KPN1062 | NDM-5 | 64 (R) | 64/4 (R) |  | 2 | 1/4 | 0.05 | Syn |  | 6 (R) | 6 (R) | 26 (S) | 22 (S) | Syn | CA |
| KPN1108 | NDM-1 | 128 (R) | 64/4 (R) |  | 1 | 2/4 | 0.04 | Syn |  | 6 (R) | 8 (R) | 23 (S) | 21 (S) | Syn | CA |
| KPN3528 | NDM-1 | 128 (R) | 32/4 (R) |  | 8 | 4/4 | 0.19 | Syn |  | 6 (R) | 8 (R) | 25 (S) | 24 (S) | Syn | CA |
| KPN8696 | NDM-1 | 0.25 (S) | 128/4 (R) |  | 0.25 | 1/4 | 1.01 | NI |  | 21 (S) | 6 (R) | 23 (S) | 22 (S) | NI | CA |
| KPN9389 | NDM-1 | 128 (R) | 128/4 (R) |  | 4 | 2/4 | 0.05 | Syn |  | 6 (R) | 6 (R) | 23 (S) | 21 (S) | Syn | CA |
| KPN9398 | NDM-1 | 128 (R) | 32/4 (R) |  | 8 | 4/4 | 0.19 | Syn |  | 6 (R) | 9 (R) | 24 (S) | 23 (S) | Syn | CA |
| KOX0228 | KPC-2, IMP-4 | 128 (R) | 64/4 (R) |  | 1 | 2/4 | 0.04 | Syn |  | 6 (R) | 6 (R) | 24 (S) | 24 (S) | Syn | CA |
| KOX1036 | NDM-1 | 128 (R) | 128/4 (R) |  | 1 | 1/4 | 0.02 | Syn |  | 6 (R) | 6 (R) | 25 (S) | 25 (S) | Syn | CA |
| CFR1077 | NDM-1 | 64 (R) | 64/4 (R) |  | 2 | 2/4 | 0.06 | Syn |  | 6 (R) | 6 (R) | 24 (S) | 23 (S) | Syn | CA |
| **Day3** |  |  |  |  |  |  |  |  |  |  |  |  |  |  |  |
| ECO1007 | NDM-1 | 128 (R) | 128/4 (R) |  | 2 | 2/4 | 0.03 | Syn |  | 6 (R) | 6 (R) | 23 (S) | 22 (S) | Syn | CA |
| ECO1060 | NDM-5 | 64 (R) | 128/4 (R) |  | 4 | 1/4 | 0.07 | Syn |  | 6 (R) | 6 (R) | 22 (S) | 24 (S) | Syn | CA |
| ECO1065 | NDM-7 | 128 (R) | 64/4 (R) |  | 2 | 4/4 | 0.08 | Syn |  | 6 (R) | 6 (R) | 25 (S) | 25 (S) | Syn | CA |
| ECO1085 | NDM-1 | 64 (R) | 128/4 (R) |  | 2 | 1/4 | 0.04 | Syn |  | 6 (R) | 6 (R) | 23 (S) | 23 (S) | Syn | CA |
| ECO1086 | NDM-1 | 128 (R) | 64/4 (R) |  | 4 | 2/4 | 0.06 | Syn |  | 6 (R) | 6 (R) | 25 (S) | 24 (S) | Syn | CA |
| ECO4967 | NDM-1 | 64 (R) | 64/4 (R) |  | 8 | 4/4 | 0.19 | Syn |  | 6 (R) | 6 (R) | 21 (S) | 13 (S) | Syn | CA |
| ECO5010 | NDM-1 | 64 (R) | 128/4 (R) |  | 8 | 4/4 | 0.16 | Syn |  | 13 (R) | 6 (R) | 30 (S) | 28 (S) | Syn | CA |
| ECO5061 | NDM-1 | 64 (R) | 64/4 (R) |  | 4 | 4/4 | 0.13 | Syn |  | 6 (R) | 6 (R) | 13 (R) | 12 (S) | NI | MIE |
| ECO5104 | NDM-5 | 128 (R) | 64/4 (R) |  | 4 | 4/4 | 0.09 | Syn |  | 6 (R) | 8 (R) | 24 (S) | 23 (S) | Syn | CA |
| ECO5215 | NDM-5 | 64 (R) | 128/4 (R) |  | 2 | 2/4 | 0.05 | Syn |  | 6 (R) | 6 (R) | 25 (S) | 24 (S) | Syn | CA |
| ECO6014 | NDM-3 | 128 (R) | 64/4 (R) |  | 1 | 1/4 | 0.02 | Syn |  | 6 (R) | 6 (R) | 23 (S) | 22 (S) | Syn | CA |
| ECO6221 | NDM-1 | 128 (R) | 64/4 (R) |  | 4 | 4/4 | 0.09 | Syn |  | 6 (R) | 6 (R) | 24 (S) | 22 (S) | Syn | CA |
| ECO8046 | NDM-1 | 128 (R) | 64/4 (R) |  | 8 | 2/4 | 0.09 | Syn |  | 6 (R) | 6 (R) | 23 (S) | 22 (S) | Syn | CA |
| ECO8096 | NDM-1 | 64 (R) | 128/4 (R) |  | 8 | 4/4 | 0.16 | Syn |  | 6 (R) | 6 (R) | 13 (R) | 13 (S) | NI | MIE |
| ECL1007 | NDM-1 | 128 (R) | 64/4 (R) |  | 0.5 | 0.5/4 | 0.01 | Syn |  | 6 (R) | 7 (R) | 26 (S) | 25 (S) | Syn | CA |
| ECL1012 | NDM-1 | 128 (R) | 128/4 (R) |  | 0.25 | 1/4 | 0.01 | Syn |  | 6 (R) | 6 (R) | 24 (S) | 24 (S) | Syn | CA |
| ECL1031 | NDM-5 | 64 (R) | 32/4 (R) |  | 1 | 1/4 | 0.05 | Syn |  | 6 (R) | 6 (R) | 21 (S) | 19 (S) | Syn | CA |
| ECL1034 | NDM-1 | 64 (R) | 32/4 (R) |  | 1 | 1/4 | 0.05 | Syn |  | 15 (R) | 12 (R) | 23 (S) | 22 (S) | Syn | CA |
| ECL3024 | NDM-1 | 128 (R) | 64/4 (R) |  | 4 | 4/4 | 0.09 | Syn |  | 6 (R) | 6 (R) | 26 (S) | 25 (S) | Syn | CA |
| KPN0429 | NDM-1 | 0.25 (S) | 32/4 (R) |  | 0.25 | 0.5/4 | 1.02 | NI |  | 34 (S) | 6 (R) | 34 (S) | 33 (S) | NI | CA |
| KPN1011 | NDM-1 | 128 (R) | 128/4 (R) |  | 4 | 2/4 | 0.05 | Syn |  | 6 (R) | 6 (R) | 25 (S) | 24 (S) | Syn | CA |
| KPN1037 | IMP-4 | 0.25 (S) | 32/4 (R) |  | 0.25 | 0.25/4 | 1.01 | NI |  | 25 (S) | 8 (R) | 27 (S) | 25 (S) | NI | CA |
| KPN1039 | NDM-1 | 16 (R) | 32/4 (R) |  | 0.5 | 1/4 | 0.06 | Syn |  | 15 (R) | 8 (R) | 25 (S) | 23 (S) | Syn | CA |
| KPN1062 | NDM-5 | 128 (R) | 64/4 (R) |  | 2 | 1/4 | 0.03 | Syn |  | 6 (R) | 6 (R) | 24 (S) | 22 (S) | Syn | CA |
| KPN1108 | NDM-1 | 128 (R) | 64/4 (R) |  | 1 | 2/4 | 0.04 | Syn |  | 6 (R) | 6 (R) | 22 (S) | 21 (S) | Syn | CA |
| KPN3528 | NDM-1 | 128 (R) | 32/4 (R) |  | 8 | 4/4 | 0.19 | Syn |  | 6 (R) | 7 (R) | 25 (S) | 24 (S) | Syn | CA |
| KPN8696 | NDM-1 | 0.25 (S) | 64/4 (R) |  | 0.25 | 2/4 | 1.03 | NI |  | 21 (S) | 6 (R) | 22 (S) | 22 (S) | NI | CA |
| KPN9389 | NDM-1 | 128 (R) | 128/4 (R) |  | 4 | 2/4 | 0.05 | Syn |  | 6 (R) | 6 (R) | 23 (S) | 22 (S) | Syn | CA |
| KPN9398 | NDM-1 | 128 (R) | 32/4 (R) |  | 8 | 4/4 | 0.19 | Syn |  | 6 (R) | 6 (R) | 25 (S) | 24 (S) | Syn | CA |
| KOX0228 | KPC-2, IMP-4 | 128 (R) | 64/4 (R) |  | 1 | 2/4 | 0.04 | Syn |  | 6 (R) | 6 (R) | 25 (S) | 24 (S) | Syn | CA |
| KOX1036 | NDM-1 | 128 (R) | 128/4 (R) |  | 0.5 | 1/4 | 0.01 | Syn |  | 6 (R) | 6 (R) | 28 (S) | 26 (S) | Syn | CA |
| CFR1077 | NDM-1 | 64 (R) | 64/4 (R) |  | 2 | 2/4 | 0.06 | Syn |  | 6 (R) | 6 (R) | 24 (S) | 23 (S) | Syn | CA |

**Note:** The underline indicates that the results of the two methods are inconsistent.

**Abbreviations:** ATM, aztreonam; CA, categorical agreement; CFR, *Citrobacter freundii*; CZA, ceftazidime/avibactam; ECL, *Enterobacter cloacae complex*; ECO, *Escherichia coli*; FICI, fractional inhibitory concentration index；KOX, *Klebsiella oxytoca*; KPN, *Klebsiella pneumoniae*; MIC, minimum inhibitory concentration; MIE, minor error; NI, no interaction; R, resistant; S, sensitive; Syn, Synergy.
